# Supplementary material for: Recent Trends in Frequency and Duration of Global Floods
Source: Copernicus journal article supplement (doi:10.5194/esd-2017-59), 2017-07-04
Supplement: Supplementary file [file esd-2017-59-RC1-supplement.pdf]

Review of the manuscript “Recent Trends in Frequency and Duration of Global Floods” by Najibi and Devineni for publication in the journal *Earth System Dynamics*.

Dear Editor,

I have just read the abstract and the introduction section of the above-referenced manuscript. In these two sections (three pages total), I find the writing of the manuscript is of poor quality, and it is difficult to understand the sentences well. I have observed many grammatical inconsistencies in the first two pages of the manuscript (see some specific comments below), and there I stopped making further suggestions on grammar/professional writing.

With these many comments in just three pages, I think it is in the best interest of the potential readers to return the paper for English writing corrections. I strongly suggest the authors to send the manuscript to an English writing professional for modifications and corrections before sending it for a review, to this journal or elsewhere.

### Comments:

L1: "The" Dartmouth.

L13: Remove "also".

L13-14: ‘This analysis provides framework for understanding changing climate and socioeconomic conditions’ is a very broad statement; I suggest removing this sentence and replacing it with one that is more relevant to the present analysis.

L14: use comma after 'conditions'.

L23: put ', respectively,' before 'showed that'.

L23: replace "had" with "have"

L23: Vogel et al., 2013 reference is not complete (see L694-695)

L24-27: Sentence may be improved for clarity. Use appropriate punctuation at appropriate positions (e.g., I would put a comma before 'mainly'). The term 'flood events' shows two times in the sentence, consider rephrasing.

L31: Replace 'was' with 'is'.

L30-35: This sentence can be improved for conciseness and clarity.

L34: Mention the year(s) of flood(s).

L35: 'This research' is this specific type of research? The cited references suggest otherwise.

L50-51: This is not professional writing. Please revise the sentence.

L37-39: Put a comma before 'and the physical'. Put 'events' after 'rainfall'.

Correct the website address in the reference (see L563).

L44: Replace 'a' with 'the'.

L45-47: Try more direct sentences. In the sentence, you have 'utilization', 'information', 'inundation', all are nouns.

L50: No satellite is mentioned before this sentence, which ones are being referred here?

L50-51: This is not professional writing. Please revise the sentence.

L50-56: These sentences are not properly structured. There should be a smooth transition from one sentence to the next, right now this difficult to see. See also the paragraph from L66-76.

L57: Replace 'these' with 'the following'.

L58-62: As flood duration has a probability distribution, annual frequency also has a corresponding distribution. Is there a reason that only one distribution is mentioned?

L66: Remove 'tried'.

L67: What does "probability distribution of floods" mean?

L77-78: This is not professional writing.

L79: Replace 'using a' with 'using the'.

What are the reasons of performing trend analysis (or changes in other flood statistics) at global scale? There is a large body of literature that has studied the changes at local and regional scales, would it be easier to combine all studies (kind of a Review Paper) and see the global and latitudinal changes?

I understand that a coherent global scale analysis will be useful for disentangling different relationships; however, a strong motivation and justification for doing this is lacking here. Based on this and the above comments, the entire Introduction section needs to a complete revamp.
